# Supplementary material
Source: Royal Society of Chemistry journal article supplement (doi:10.1039/d6tc00547k)
Supplement: d6tc00547k1.pdf [file d6tc00547k1.pdf]

Supplementary Material

**Co-substitution of Zn<sup>2+</sup>/Ge<sup>4+</sup> pair within garnet phosphors  
activated by Er<sup>3+</sup> for enhancing luminescence properties  
and optical thermometry**

Yuanhao Chen, Xiaoshan Zhang, Yirong Liu, Haisheng Liu, Dechao Yu,\* and Dawei Zhang

*Engineering Research Center of Optical Instrument and System, The Ministry of Education, Shanghai  
Key Laboratory of Modern Optical System, University of Shanghai for Science and Technology,  
Shanghai 200093, China*

\*Corresponding authors: Dechao Yu, [d.yu@usst.edu.cn](mailto:d.yu@usst.edu.cn)

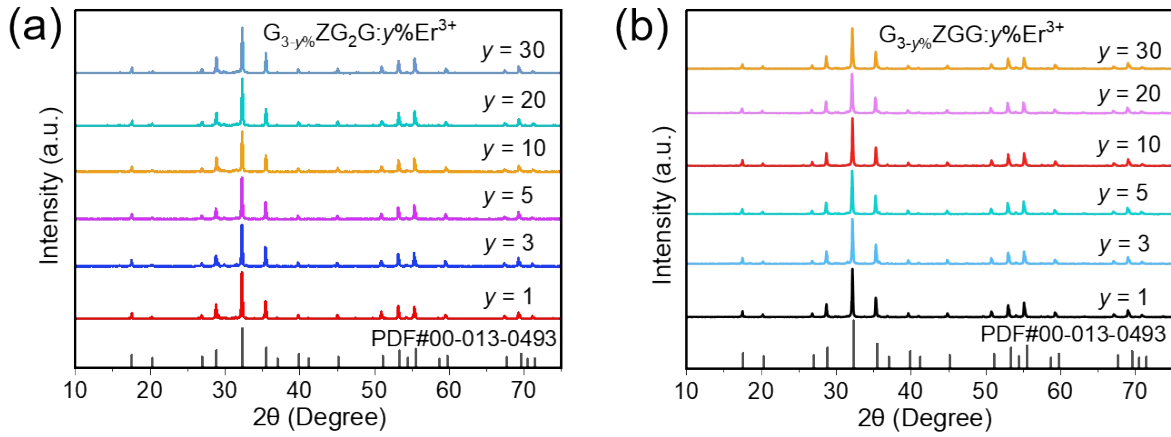

**Fig. S1.** XRD patterns of  $G_{3-y}\%ZG_2G:y\%Er^{3+}$  ( $y = 1, 3, 5, 10, 20, 30$ ) and  $G_{3-y}\%ZGG:y\%Er^{3+}$  ( $y = 1, 3, 5, 10, 20, 30$ ) phosphors obtained at room temperature, as well as that of the  $Gd_3Ga_5O_{12}$  standard reference (PDF#00-013-0493).

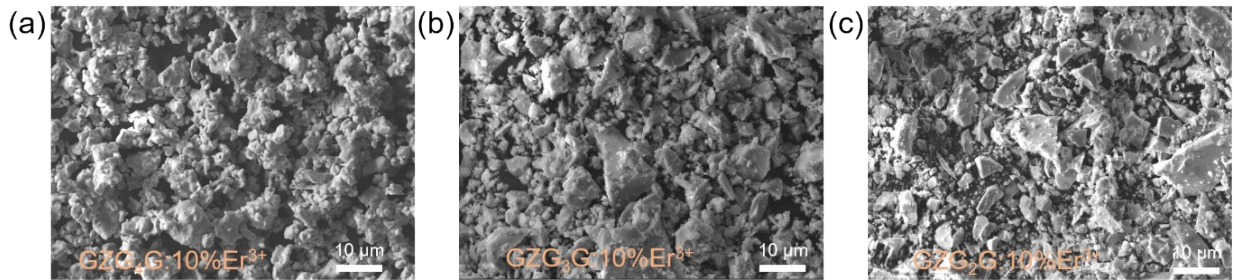

**Fig. S2.** SEM images of (a)  $GZG_4G:10\%Er^{3+}$ , (b)  $GZG_3G:10\%Er^{3+}$  and (c)  $GZG_2G:10\%Er^{3+}$  samples.

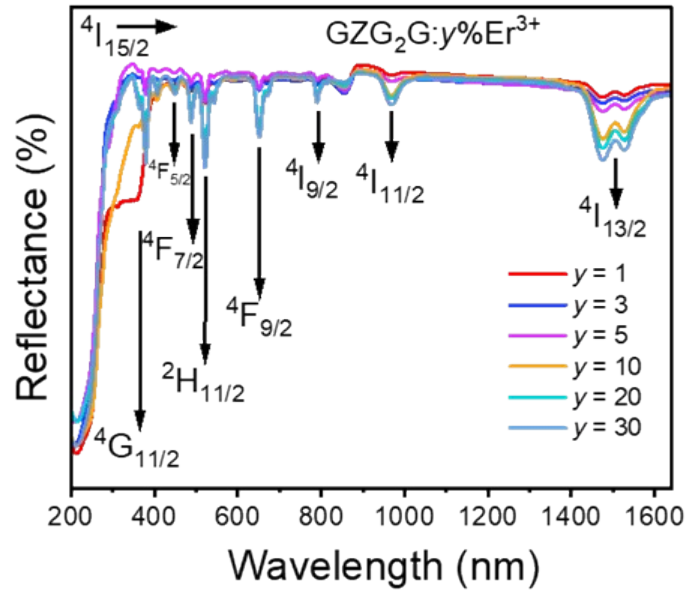

**Fig. S3.** Diffuse reflectance spectra of as-prepared  $\text{GZG}_2\text{G}:y\%\text{Er}^{3+}$  ( $y = 1, 3, 5, 10, 20, 30$ ) solid solution phosphors.

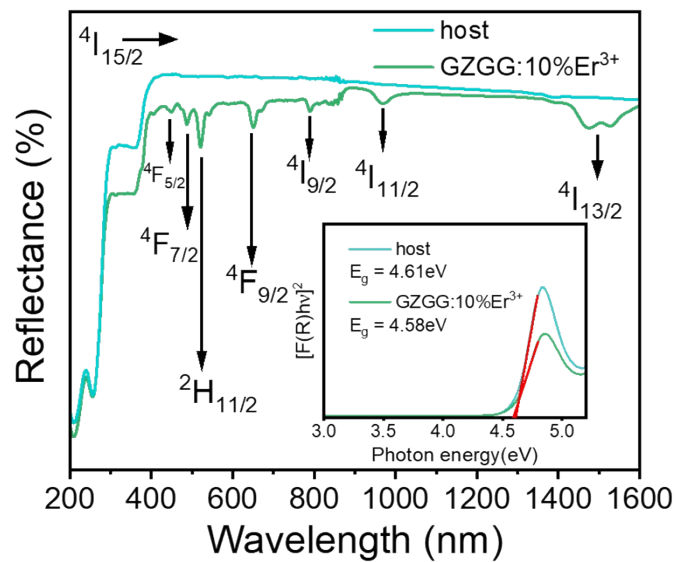

**Fig. S4.** Diffuse reflectance spectra and the band gap ( $E_g$ ) of GZGG host and  $\text{GZGG}:10\%\text{Er}^{3+}$  samples.

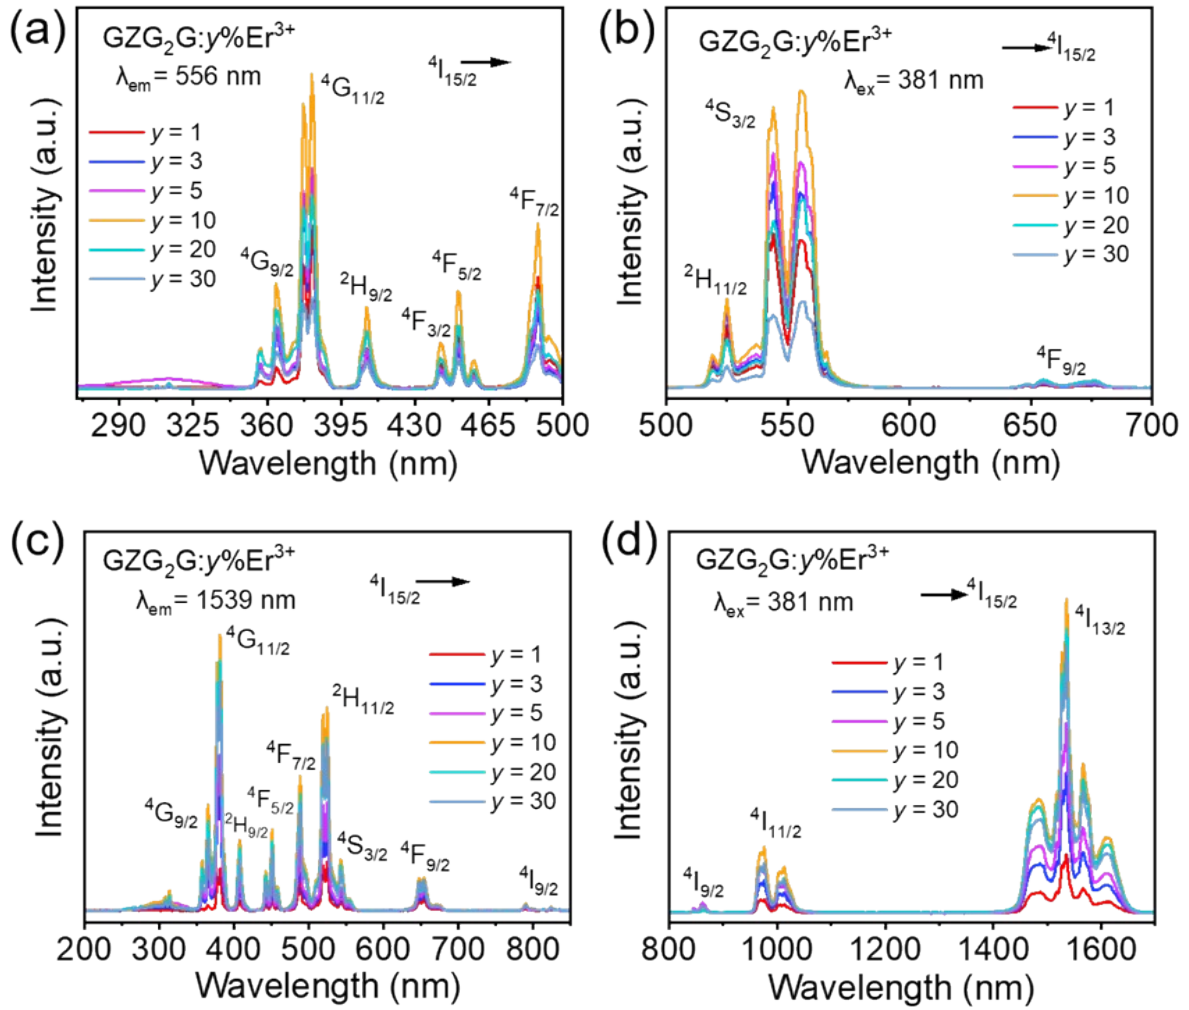

**Fig. S5.** (a) PLE spectra of  $\text{GZG}_2\text{G:y\%Er}^{3+}$  ( $y = 1, 3, 5, 10, 20, 30$ ) monitoring  $\text{Er}^{3+}: 4\text{S}_{3/2} \rightarrow 4\text{I}_{15/2}$  transition at 556 nm and (c) that monitoring  $\text{Er}^{3+}: 4\text{I}_{13/2} \rightarrow 4\text{I}_{15/2}$  transition at 1539 nm. (b) Visible PL and (d) NIR PL spectra of  $\text{GZG}_2\text{G:y\%Er}^{3+}$  excited at 381 nm, respectively.

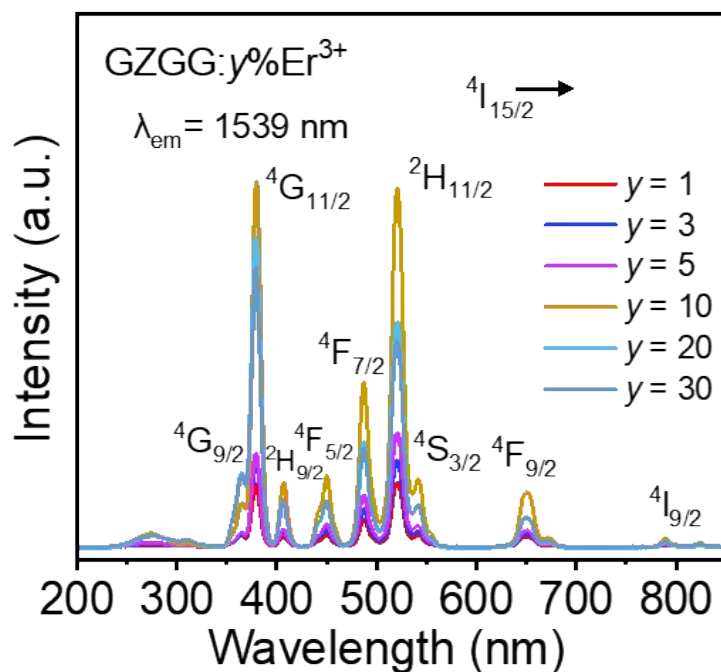

**Fig. S6.** PLE spectra of GZGG:y%Er<sup>3+</sup> monitoring the  ${}^4I_{13/2} \rightarrow {}^4I_{15/2}$  at  $\sim 1539$  nm.

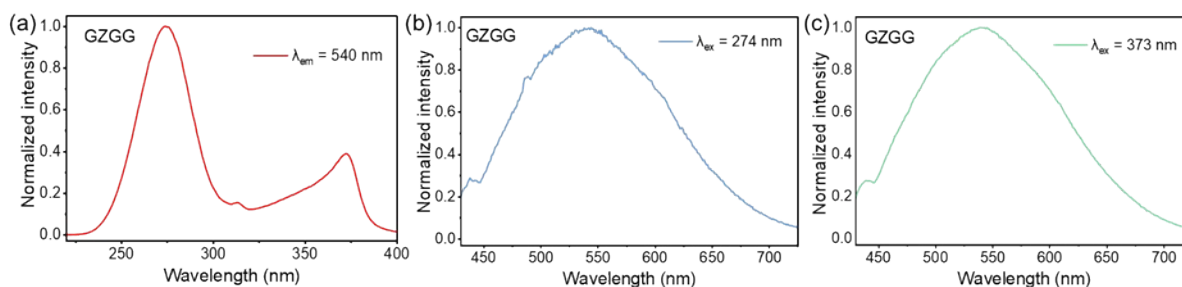

**Fig. S7.** Normalized visible PLE and PL spectra of the GZGG host matrix. The red curve is the PLE spectrum monitored at 540 nm (a), while the blue (b) and green (c) curves represent the PL spectra excited at 274 and 373 nm, respectively.

**Table S1.** Crystallographic data of  $\text{GZG}_{5-2x}\text{G}:10\%\text{Er}^{3+}$  ( $x = 0.5, 1, 1.5, 2.0$ ) with different chemical composite  $x$  values

| Formula                       | $x = 0.5$ | $x = 1$ | $x = 1.5$ | $x = 2$ |
|-------------------------------|-----------|---------|-----------|---------|
| Crystal system                | Cubic     |         |           |         |
| Space group                   | Iad       |         |           |         |
| Lattice parameters            |           |         |           |         |
| a/b/c (Å)                     | 12.47     | 12.47   | 12.67     | 12.74   |
| $\alpha/\beta/\gamma$ (°)     | 90        | 90      | 90        | 90      |
| $2\theta$ (°)                 | 32.4      | 32.3    | 32.2      | 32.1    |
| Cell volume (Å <sup>3</sup> ) | 1939.10   | 1940.66 | 1945.44   | 1967.80 |
| $R_p$                         | 6.78      | 8.13    | 6.04      | 6.61    |
| $R_{wp}$                      | 8.99      | 11.81   | 8.10      | 7.69    |
| $\chi^2$                      | 1.69      | 2.36    | 1.97      | 1.67    |

**Table S2.** Calculated decay time of Er<sup>3+</sup> emission at ~ 556 nm (<sup>4</sup>S<sub>3/2</sub> → <sup>4</sup>I<sub>15/2</sub>), as well as the fitting parameters and R-squared (R<sup>2</sup>) values for the GZG<sub>5-2x</sub>G:10%Er<sup>3+</sup> (x = 0.5, 1, 1.5, 2) samples under pulsed light excitation of 381 nm. Fitting was performed using a bi-exponential decay model

| GZG <sub>5-2x</sub> G: | Green emission: <sup>4</sup> S <sub>3/2</sub> → <sup>4</sup> I <sub>15/2</sub> at ~556 nm |                                          |                             |                                                  |                          |       |       |                |
|------------------------|-------------------------------------------------------------------------------------------|------------------------------------------|-----------------------------|--------------------------------------------------|--------------------------|-------|-------|----------------|
|                        | I <sub>0</sub> (Background)                                                               | A <sub>1</sub> (Amplitude of fast decay) | A <sub>2</sub> (slow decay) | Decay time (μs)                                  |                          | α     | β     | R <sup>2</sup> |
| x = 0.5                | 0.002                                                                                     | 0.96                                     | 0.019                       | τ <sub>1</sub> ~ 118<br>τ <sub>2</sub> ~ 454.1   | τ <sub>avr</sub> ~ 124.6 | 0.982 | 0.018 | 0.9988         |
| x = 1                  | 0.001                                                                                     | 0.753                                    | 0.219                       | τ <sub>1</sub> ~ 105.4<br>τ <sub>2</sub> ~ 176.5 | τ <sub>avr</sub> ~ 121.5 | 0.774 | 0.226 | 0.9995         |
| x = 1.5                | 0.002                                                                                     | 0.68                                     | 0.312                       | τ <sub>1</sub> ~ 71.0<br>τ <sub>2</sub> ~ 141.1  | τ <sub>avr</sub> ~ 93.0  | 0.685 | 0.315 | 0.9992         |
| x = 2                  | 0.001                                                                                     | 0.912                                    | 0.073                       | τ <sub>1</sub> ~ 66.4<br>τ <sub>2</sub> ~ 194    | τ <sub>avr</sub> ~ 75.9  | 0.927 | 0.073 | 0.9993         |

**Table S3.** Optical temperature sensing performances of GZG<sub>3</sub>G:10%Er<sup>3+</sup> in comparison with other reported Er<sup>3+</sup>-activated thermometric phosphors

| Schemes                                                        | Materials                                                    | Temperature range (K) | Sr (% K <sup>-1</sup> ) | Ref.      |
|----------------------------------------------------------------|--------------------------------------------------------------|-----------------------|-------------------------|-----------|
| Er <sup>3+</sup>                                               | NSGM: Er <sup>3+</sup>                                       | 298–488               | 0.87                    | 1         |
|                                                                | MgMoO <sub>4</sub> : Er <sup>3+</sup>                        | 323–573               | 0.83                    | 2         |
|                                                                | Bi <sub>3</sub> TeBO <sub>9</sub> :xEr <sup>3+</sup>         | 298–473               | 0.87                    | 3         |
|                                                                | LaOF:Er <sup>3+</sup>                                        | 298–373               | 1.24                    | 4         |
| <sup>2</sup> H <sub>11/2</sub> - <sup>4</sup> S <sub>3/2</sub> | SrLaLiTeO <sub>6</sub> : Yb <sup>3+</sup> , Er <sup>3+</sup> | 458–698               | 0.84                    | 5         |
| TCLs                                                           | NaGdF <sub>4</sub> :Yb <sup>3+</sup> , Er <sup>3+</sup>      | 317–342               | 0.60                    | 6         |
|                                                                | Sr <sub>3</sub> WO <sub>6</sub> :Er <sup>3+</sup>            | 303–513               | 0.56                    | 7         |
|                                                                | GZG <sub>3</sub> G:10%Er <sup>3+</sup>                       | 298–573               | 1.25                    | This work |

## References

1. Taleb, Z. E. A. A.; Saidi, K.; Dammak, M. The dual-model up/down-conversion green luminescence of NaSrGd(MoO<sub>4</sub>)<sub>3</sub>: Er<sup>3+</sup> and its application for temperature sensing. *RSC Adv.* **2024**, 14 (12), 8366-8377.
2. Zheng, H.; Zhou, X.; Li, S.; Li, L.; Deng, Y.; Huang, J.; Yan, Y. Research on the luminescent and thermometric properties of MgMoO<sub>4</sub>: Er<sup>3+</sup>. *Mater. Res. Bull.* **2024**, 179, 112944.
3. Jiang, H.; Song, J.; Hu, Q.; Su, Y.; Wen, Q.; Liu, L.; Zhu, J. Up/down-conversion luminescence and optical thermometry of Er<sup>3+</sup>-activated bismuth tellurium borate. *J. Alloys Compd.* **2024**, 1005, 176002.
4. Rakov, N.; Matias, F.; Porfirio, F.; Maciel, G. S. Optical thermometry exploring up-conversion and down-shifting of photons in LaOF:Er<sup>3+</sup> ceramic powders. *Ceram. Int.* **2025**, 51, 55968-55979.
5. Gong, S.; Wu, R.; Han, Q.; Kong, D.; Wu, W. Lead-free perovskite Rb<sub>2</sub>Sn<sub>1-x</sub>Te<sub>x</sub>Cl<sub>6</sub> with bright luminescence for optical thermometry and tunable white light emitting diodes. *J. Mater. Chem. C* **2022**, 10 (36), 13217-13224.
6. Liu, X. B.; Skripka, A.; Lai, Y. M.; Jiang, Y.; Liu, J. D.; Vetrone, F.; Liang, J. Y. Fast wide-field upconversion luminescence lifetime thermometry enabled by single-shot compressed ultrahigh-speed imaging. *Nat. Commun.* **2021**, 12, 6401.
7. Degda, N.; Patel, N.; Chaudhari, K.; Murthy, K. V. R.; Srinivas, M. Ratiometric thermometry using down-conversion luminescence and solid-state lighting application of Er<sup>3+</sup> activated strontium tungstate phosphor. *Phys. B: Condens. Mater.* **2024**, 683, 415923
